# Supplementary material for: Comparative analysis of machine learning algorithms and scales for estimating boreal forest above ground biomass in the Qilian Mountains, China
Source: Research Square preprint supplement (doi:10.21203/rs.3.rs-3448183/v1), 2023-10-19
Supplement: Supplementary file 1 [file 8be36fb8631ff51827035e2b.docx]

# Appendix A

Summary of the species-specific allometric equations and carbon content conversion factor in Qilian Mountains

| **Tree species** | **Equation** | **Reference** |
| --- | --- | --- |
| *Picea crassifolia* | 1 | Wang et al. (1998) |
| *Juniperus przewalskii* |  | Wang et al. (1998) |
| *Platycladus Orientalis* |  | Guan et al. (2016) |
| *Pinus tabuliformis* |  | Cheng et al. (2007) |
| *Quercus mongolica* |  | Guan et al. (2016) |
| *Populus davidiana* |  | Cheng et al. (2007) |
| *Betula Platyphylla* |  | Cheng et al. (2007) |

1 WS is the oven-dry stem biomass; WB is the oven-dry branch biomass; WL is the oven-dry leaves biomass; W is the oven-dry aboveground tree biomass, D (cm) is the diameter at breast height (1.3 m), H (m) is the tree height.
